# Supplementary material
Source: PubMed Central journal article supplement (PMC8650976)
Supplement: NIHMS1717577-supplement-Supplemental_Material.pdf [file NIHMS1717577-supplement-Supplemental_Material.pdf]

**Associations of Insulin Resistance with Systolic and Diastolic Blood Pressure: A Study  
from the Hispanic Community Health Study/Study of Latinos (HCHS/SOL)**

**SUPPLEMENTAL MATERIAL**

Odayme Quesada, MD, Brian Claggett, PhD, Fatima Rodriguez, MD, MPH, Jianwen Cai, PhD,  
Ashley E. Moncrieft, PhD, Karin Garcia, PhD, Marina Del Rios Rivera, MD, MSc, David B.  
Hanna, PhD, Martha L Daviglius, MD, PhD, Gregory Talavera, MD, C. Noel Bairey Merz, MD,  
Scott D. Solomon, MD, Susan Cheng, MD, MPH, Natalie A Bello, MD, MPH

**Correspondence:**

Natalie A Bello  
Assistant Professor of Medicine  
Division of Cardiology  
Columbia University Irving Medical Center  
622 West 168<sup>th</sup> Street, PH 3-342  
New York, NY 10032  
Phone: 212-305-1436  
Fax: 212-305-9049  
[nb338@cumc.columbia.edu](mailto:nb338@cumc.columbia.edu)  
[Twitter @nataliebello](https://twitter.com/nataliebello)

**Table S1: Demographics and Clinical Characteristics by ACC/AHA Blood Pressure Categories in the Hispanic Community**

**Health Study/Study of Latinos at Visit 1 (2008-2011)**

| <b>Characteristics at Visit 1</b>              | <b>Normal BP</b> | <b>Elevated BP</b> | <b>Stage 1 HTN</b> | <b>Stage 2 HTN</b> |
|------------------------------------------------|------------------|--------------------|--------------------|--------------------|
| <b>Demographics</b>                            |                  |                    |                    |                    |
| Female, %                                      | 61.6             | 30.4               | 41.2               | 44.8               |
| Age, yrs, mean (SD)                            | 33.8 (11.6)      | 37.7 (14.3)        | 41.7 (12.7)        | 50.6 (13.1)        |
| Annual Family Income $\geq$ \$40,000, %        | 22.1             | 25.0               | 21.3               | 19.5               |
| Years living in U.S., yrs, mean (SD)           | 17.5 (12.2)      | 18.2 (13.6)        | 20.8 (14.7)        | 22.4 (16.4)        |
| Health Insurance, %                            | 46.6             | 44.8               | 47.0               | 46.1               |
| Hispanic/Latin Background, %                   |                  |                    |                    |                    |
| Dominican                                      | 9.5              | 9.7                | 11.4               | 9.6                |
| Central/South American                         | 13.4             | 13.2               | 12.1               | 14.2               |
| Cuban                                          | 15.6             | 18.8               | 25.0               | 31.8               |
| Mexican                                        | 43.1             | 38.1               | 32.7               | 24.9               |
| Puerto-Rican                                   | 13.2             | 16.1               | 14.7               | 17.6               |
| Other or more than 1 heritage                  | 5.1              | 4.0                | 4.2                | 1.9                |
| <b>Clinical Characteristics</b>                |                  |                    |                    |                    |
| CKD, %                                         | 1.1              | 3.0                | 3.7                | 6.1                |
| Metabolic Syndrome, %                          | 12.6             | 17.9               | 38.8               | 54.7               |
| Current smoker, %                              | 21.2             | 23.2               | 21.5               | 21.9               |
| Alcohol use, drinks/week, mean (SD)            | 4.4 (7.1)        | 6.2 (8.0)          | 6.8 (9.7)          | 7.0 (0.0)          |
| TPA, metabolic min/day, mean (SD)              | 144.4 (199.0)    | 176.9 (205.5)      | 134.8 (184.3)      | 116.5 (176.6)      |
| <b>Clinical Measures</b>                       |                  |                    |                    |                    |
| Body mass index, kg/m <sup>2</sup> , mean (SD) | 27.9 (5.9)       | 28.5 (4.9)         | 30.4 (5.8)         | 30.3 (5.5)         |
| Waist/hip ratio, mean (SD)                     | 0.9 (0.1)        | 0.9 (0.1)          | 0.9 (0.1)          | 0.9 (0.1)          |
| Heart rate, bpm, mean (SD)                     | 64.7 (9.0)       | 63.1 (9.3)         | 66.7 (10.1)        | 66.5 (10.4)        |
| Systolic BP, mmHg, mean (SD)                   | 107.3 (7.8)      | 123.6 (2.7)        | 127.9 (7.1)        | 147.4 (12.2)       |
| Diastolic BP, mmHg, mean (SD)                  | 65.5 (6.9)       | 71.8 (5.6)         | 80.5 (5.9)         | 88.2 (10.1)        |
| MAP, mmHg, mean (SD)                           | 79.4 (6.4)       | 89.1 (3.9)         | 96.3 (4.0)         | 107.9 (8.4)        |

|                                     |              |              |               |               |
|-------------------------------------|--------------|--------------|---------------|---------------|
| Pulse pressure, mmHg, mean (SD)     | 41.8 (7.0)   | 51.8 (6.0)   | 47.3 (10.5)   | 59.3 (14.6)   |
| <b>Laboratory Measures</b>          |              |              |               |               |
| Total cholesterol, mg/dL, mean (SD) | 184.0 (39.0) | 195.2 (40.6) | 203.0 (42.5)  | 214.4 (45.0)  |
| HDL cholesterol, mg/dL, mean (SD)   | 49.5 (12.5)  | 47.4 (12.3)  | 47.8 (13.0)   | 49.9 (15.2)   |
| LDL cholesterol, mg/dL, mean (SD)   | 112.8 (33.2) | 122.1 (34.7) | 127.3 (36.5)  | 135.4 (39.2)  |
| Triglycerides, mg/dL, mean (SD)     | 109.1 (74.9) | 131.8 (89.6) | 143.8 (111.6) | 158.5 (122.8) |
| Proteinuria, %                      | 4.7          | 4.2          | 5.4           | 12.9          |
| HbA1c, %, mean (SD)                 | 5.3 (0.3)    | 5.4 (0.4)    | 5.5 (0.4)     | 5.6 (0.4)     |
| Fasting glucose, mg/dL, mean (SD)   | 91.5 (7.7)   | 94.1 (7.4)   | 95.5 (8.1)    | 96.8 (9.1)    |
| HOMA-IR, mean (SD)                  | 2.5 (2.1)    | 2.7 (2.2)    | 3.4 (2.4)     | 3.3 (2.1)     |

BP, pressure; Normal BP (<120 mmHg and DBP <80 mmHg), elevated BP (SBP 120-129 mmHg and DBP <80 mmHg), stage 1 hypertension (SBP 130-139 mmHg or DBP 80-89 mmHg), stage 2 hypertension (SBP ≥140 mmHg or DBP ≥90 mmHg); CKD, chronic kidney disease (eGFR <60 mL/min/1.73m<sup>2</sup>); MAP, mean arterial BP; HDL, high density lipoprotein; LDL, low density lipoprotein; proteinuria (urine albumin/creatinine >30mg/g); HbA1c, hemoglobin A1c; HOMA-IR, Homeostatic model assessment-Insulin Resistance; Global Physical Activity Questionnaire was used to derive total physical activity (TPA) in min/day
